# Supplementary material for: Systematic analysis of the regulatory functions of microRNAs in chicken hepatic lipid metabolism
Source: PubMed Central journal article supplement (PMC4989143; doi:10.1038/srep31766), 2016-08-18

## Supplementary information file

### Systematic analysis of the regulatory functions of microRNAs in chicken hepatic lipid metabolism

Hong Li<sup>1</sup>, Zheng Ma<sup>1</sup>, Lijuan Jia<sup>1</sup>, Yanmin Li<sup>1</sup>, Chunlin Xu<sup>1</sup>, Taian Wang<sup>1</sup>, Ruili Han<sup>1,2,3</sup>, Ruirui Jiang<sup>1,2,3</sup>, Zhuanjian Li<sup>1,2,3</sup>, Guirong Sun<sup>1,2,3</sup>, Xiangtao Kang<sup>1,2,3,\*</sup>, Xiaojun Liu<sup>1,2,3,\*</sup>

<sup>1</sup>College of Animal Science and Veterinary Medicine, Henan Agricultural University, Zhengzhou 450002, China

<sup>2</sup>Henan Innovative Engineering Research Center of Poultry Germplasm Resource, Zhengzhou 450002, China

<sup>3</sup>International Joint Research Laboratory for Poultry Breeding of Henan, Zhengzhou 450002, China

\*Corresponding authors

XK: xtkang2001@263.net

XL: xjliu2008@hotmail.com

## Supplemental Figure legend

**Figure S1** The sequence saturation analysis of six libraries.

**A:** Sequence saturation analysis of L20-1; **B:** Sequence saturation analysis of L20-2;

**C:** Sequence saturation analysis of L20-3; **D:** Sequence saturation analysis of L30-1;

**E:** Sequence saturation analysis of L30-2; **F:** Sequence saturation analysis of L30-3.

Figure S1

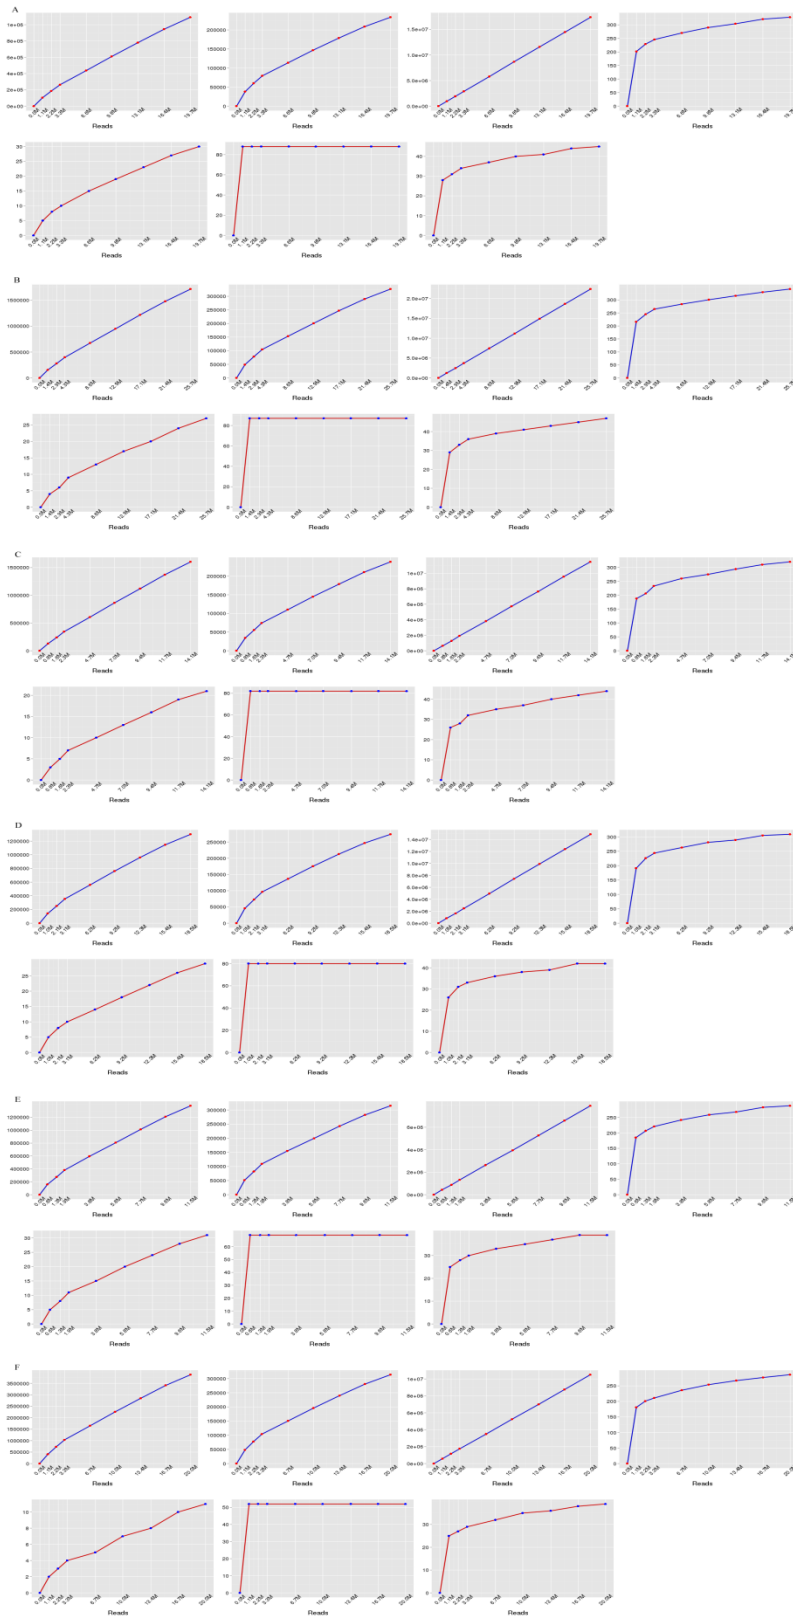

Supplement: srep31766-s1.pdf [file srep31766-s1.pdf]
